# Supplementary material for: Amorphous SiO2 surface models: energetics of the dehydroxylation process, strain, ab initio atomistic thermodynamics and IR spectroscopic signatures
Source: Royal Society of Chemistry journal article supplement (doi:10.1039/c6cp00602g), 2016-01-01
Supplement: c6cp00602g1.pdf [file c6cp00602g1.pdf]

## Amorphous SiO<sub>2</sub> Surface Models: Energetics of the Dehydroxylation Process, Strain, *Ab Initio* Atomistic Thermodynamics and IR Spectroscopic Signatures

Electronic Supporting Information

Aleix Comas-Vives

### 1. Amorphous vs. crystalline models: Bulk structures.

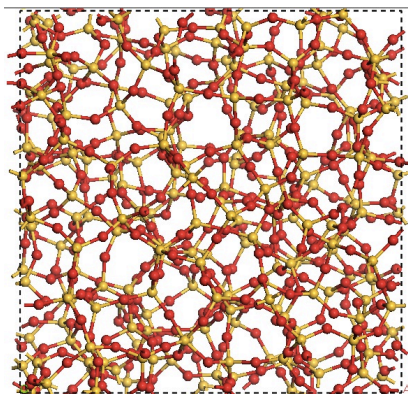

**Figure S1.** Unit cell of the amorphous SiO<sub>2</sub> bulk structure. 21.39x21.39x 21.39 Å unit cell. It contains 216 SiO<sub>2</sub> units

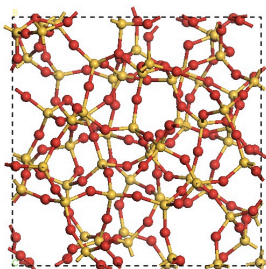

**Figure S2.** Unit cell of the amorphous SiO<sub>2</sub> bulk structure. 14.32 x 14.32 x 14.32 Å unit cell. It contains 64 SiO<sub>2</sub> units

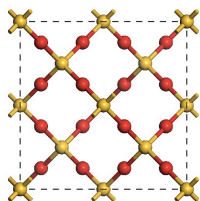

**Figure S3.** Unit cell of the  $\beta$ -cristobalite bulk structure. 7.16 x 7.16 x 7.16 Å unit cell. It contains 8 SiO<sub>2</sub> units.

## 2. Amorphous vs. crystalline models of the SiO<sub>2</sub> surface:

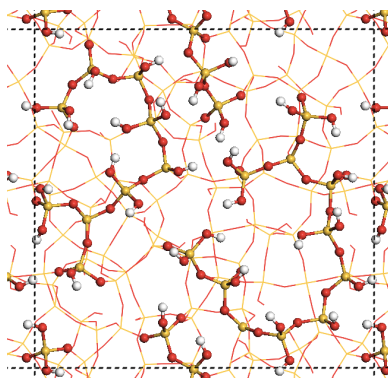

**Figure S4.** Optimized structure of the fully hydroxylated 001 termination of the amorphous silica bulk structure. The dimensions of the unit cell are 21.39x21.39x34.2 Å. It contains 408 atoms and it has a silanol coverage equal to 7.2 OH/nm<sup>2</sup>.

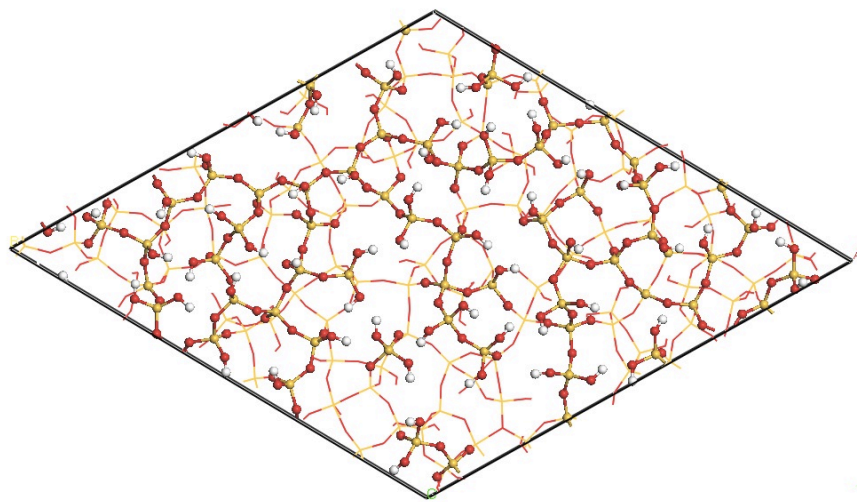

**Figure S5.** Optimized structure of the fully hydroxylated 111 termination of the amorphous silica bulk structure. The dimensions of the unit cell are 30.26x 30.26 x 33.36 Å. It contains 609 atoms and it has a silanol coverage equal to 7.2 OH/nm<sup>2</sup>.

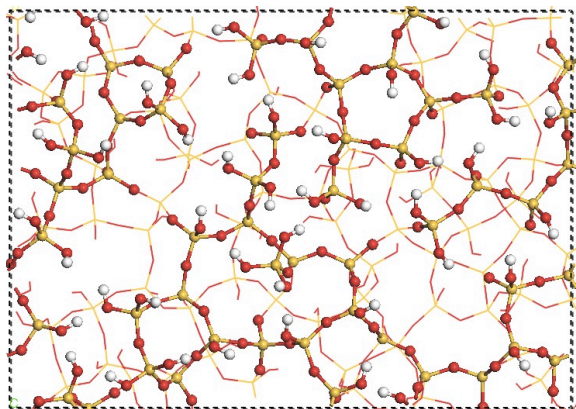

**Figure S6.** Optimized structure of the fully hydroxylated 101 termination of the amorphous silica bulk structure. The dimensions of the unit cell are 30.26x 21.39x 33.05 Å. It contains 510 atoms and it has a silanol coverage 7.3 OH/nm<sup>2</sup>.

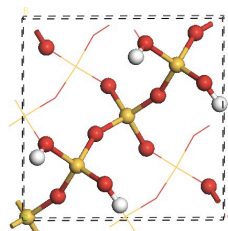

**Figure S7.** Unit cell of the fully hydroxylated 001 termination of  $\beta$ -cristobalite. Adapted from Rozanska, *et. al.*<sup>1</sup> Only geminal silanols are present on this termination.

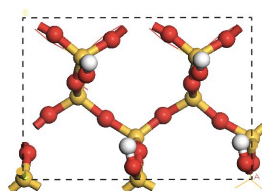

**Figure S8.** Unit cell of the fully hydroxylated 101 termination of  $\beta$ -cristobalite. Adapted from Rozanska, *et. al.*<sup>1</sup> Only vicinal silanols are present on this termination.

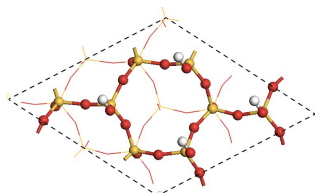

**Figure S9.** Unit cell of the fully hydroxylated ideal 111 termination of  $\beta$ -cristobalite, Adapted from Rozanska, *et. al.*<sup>1</sup> Only isolated silanols are present on this termination.

We can observe how the three termination of  $\beta$ -cristobalite present regular silanol patterns, with different kind of silanols being present depending on each surface termination. For the case of the 001 termination of  $\beta$ -cristobalite, only geminal silanols are present (Figure S7). For this surface, the direct condensation of adjacent silanol groups is possible, and feasible energetically, as previously reported by Rozanska, *et. al.*<sup>1</sup> For the 101 and 111 terminations of  $\beta$ -cristobalite only vicinal and isolated silanols are present, respectively (Figures S8,S9). Since they are far from each other, direct dehydration is not possible and SiO<sub>2</sub> reconstructions need to be considered in order to dehydroxylate them.

### 3. Effect of the dispersion on the energetics of the dehydroxylation process of the 001 SiO<sub>2</sub> surface for some selected steps.

Table S1. Comparison of the energetics of dehydroxylation with and without the inclusion of dispersion effects.

| Model               | OH/nm <sup>2</sup> | Total n H <sub>2</sub> O released | Average $\Delta E$ per nH <sub>2</sub> O (kJ.mol <sup>-1</sup> ) without dispersion (kJ.mol <sup>-1</sup> ) | $\Delta E_r$ with dispersion (kJ.mol <sup>-1</sup> ) |
|---------------------|--------------------|-----------------------------------|-------------------------------------------------------------------------------------------------------------|------------------------------------------------------|
| SiO <sub>2</sub> -1 | 7.2                | 0                                 | 0                                                                                                           | 0                                                    |
| SiO <sub>2</sub> -2 | 5.9                | 3                                 | 101                                                                                                         | 119                                                  |
| SiO <sub>2</sub> -3 | 4.6                | 6                                 | 110                                                                                                         | 131                                                  |
| SiO <sub>2</sub> -4 | 3.3                | 9                                 | 203                                                                                                         | 212                                                  |

| Model               | OH/nm <sup>2</sup> | Total n H <sub>2</sub> O released | $\Delta E$ per nH <sub>2</sub> O (kJ.mol <sup>-1</sup> ) without dispersion (kJ.mol <sup>-1</sup> ) | $\Delta E$ per nH <sub>2</sub> O (kJ.mol <sup>-1</sup> ) with dispersion (kJ.mol <sup>-1</sup> ) |
|---------------------|--------------------|-----------------------------------|-----------------------------------------------------------------------------------------------------|--------------------------------------------------------------------------------------------------|
| SiO <sub>2</sub> -5 | 2.8                | 10                                | 43                                                                                                  | 59                                                                                               |
| SiO <sub>2</sub> -6 | 2.4                | 11                                | 157                                                                                                 | 171                                                                                              |
| SiO <sub>2</sub> -7 | 2.0                | 12                                | 27                                                                                                  | 51                                                                                               |
| SiO <sub>2</sub> -8 | 1.6                | 13                                | 252                                                                                                 | 238                                                                                              |
| SiO <sub>2</sub> -9 | 1.1                | 14                                | 259                                                                                                 | 276                                                                                              |

### 4. Dehydroxylation of the smaller SiO<sub>2</sub> amorphous unit cell.

Table S2. Energetics of the dehydroxylation process via the 001 termination of the small SiO<sub>2</sub> bulk unit cell (Figure S2).

| Model                 | OH/n m <sup>2</sup> | Total n H <sub>2</sub> O released | Average Distance new O-Si bonds (Å) | $\Delta E_r$ (kJ.mol <sup>-1</sup> ) | Average $\Delta E$ per nH <sub>2</sub> O (kJ.mol <sup>-1</sup> ) |
|-----------------------|---------------------|-----------------------------------|-------------------------------------|--------------------------------------|------------------------------------------------------------------|
| SiO <sub>2</sub> -s-1 | 7.8                 | 0                                 | -                                   | 0                                    | 0                                                                |
| SiO <sub>2</sub> -s-2 | 6.8                 | 1                                 | 1.691                               | 181                                  | 181                                                              |
| SiO <sub>2</sub> -s-3 | 5.9                 | 2                                 | 1.646                               | 31                                   | 106                                                              |
| SiO <sub>2</sub> -s-4 | 4.9                 | 3                                 | 1.689                               | 186                                  | 133                                                              |
| SiO <sub>2</sub> -s-5 | 3.9                 | 4                                 | 1.655                               | -2                                   | 99                                                               |
| SiO <sub>2</sub> -s-6 | 2.9                 | 5                                 | 1.664                               | 82                                   | 96                                                               |
| SiO <sub>2</sub> -s-7 | 2.0                 | 6                                 | 1.732                               | 282                                  | 127                                                              |
| SiO <sub>2</sub> -s-8 | 1.0                 | 7                                 | 1.713                               | 255                                  | 145                                                              |

All the steps involve direct dehydroxylation except from SiO<sub>2</sub>-s-4 to SiO<sub>2</sub>-s-5 surface, where the migration of one SiO<sub>2</sub> unit was considered.

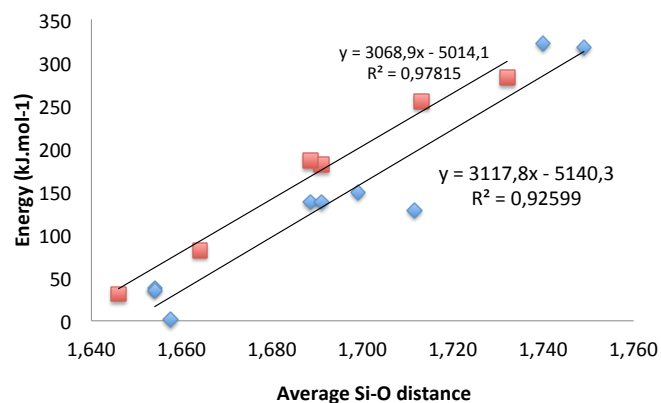

**Figure S10.** Comparison of the dehydration energy vs. average Si-O distances of the small unit cell of amorphous SiO<sub>2</sub> (in red) vs. the big unit cell of amorphous SiO<sub>2</sub> (in blue).

## 5. SiO<sub>2</sub> Reconstruction Steps

At this area of the SiO<sub>2</sub>-4 surface, there are two silanol nests where the reconstruction of the silica surface via the migration of one SiO<sub>2</sub> group can be considered (see Figure S11). Since the one with distances between oxygens equal to 5.256, 5.746 and 3.900 Å presents more similar distances than the other triangle, which has distances equal to 6.283, 4.906 and 3.900 Å, the former silanol nest was considered for the dehydroxylation step from the SiO<sub>2</sub>-4 to the SiO<sub>2</sub>-5 surface.

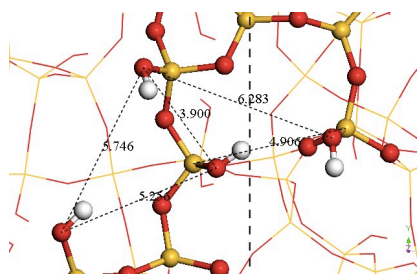

**Figure S11.** The two possible silanol nests that can be dehydroxylated via the migration of one SiO<sub>2</sub> unit on the SiO<sub>2</sub>-4 surface are depicted. Distances in Å.

For the silanol pattern on the SiO<sub>2</sub>-6 (see **Figure S12**) is not possible to consider the migration of one SiO<sub>2</sub> unit since three silanols in a triangular pattern would be needed. Thus, for this silanol pattern, the migration of two SiO<sub>2</sub> units was considered in order to further dehydroxylate the surface.

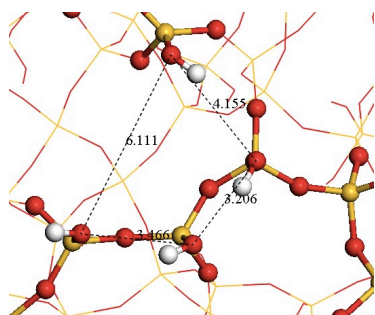

**Figure S12.** Silanol nest present on the SiO<sub>2</sub>-6 surface. Distances in Å.

## 6. Additional IR spectra.

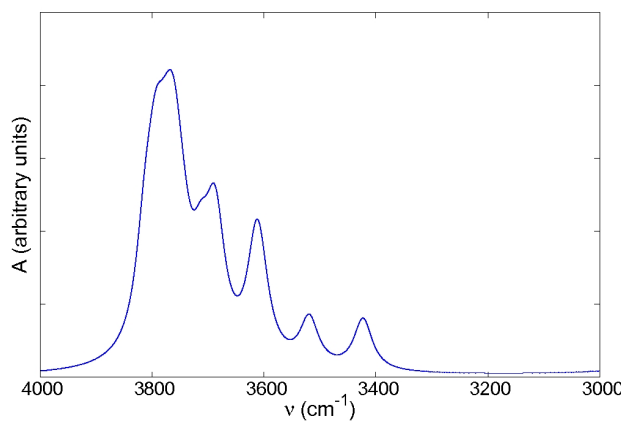

**Figure S13.** IR of the fully hydroxylated model for the small  $\text{SiO}_2$  unit cell ( $14.32 \times 14.32 \times 34.78 \text{ \AA}$ ) of amorphous  $\text{SiO}_2$ .

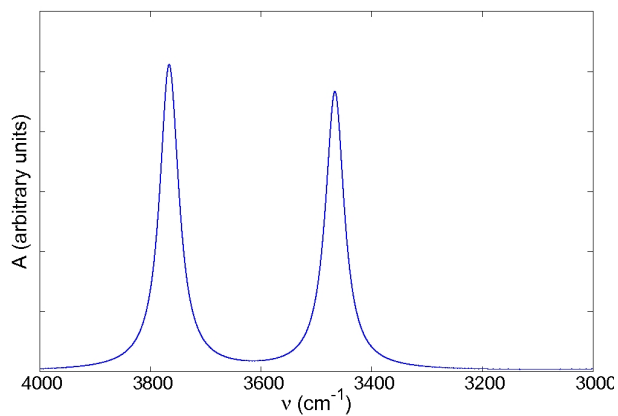

**Figure S14.** IR of the fully hydroxylated 001 crystalline model from Figure S7.

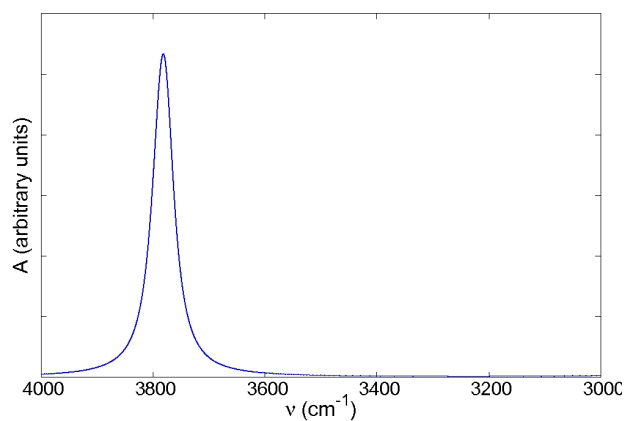

**Figure S15.** IR of the fully hydroxylated 101 crystalline model from Figure S8.

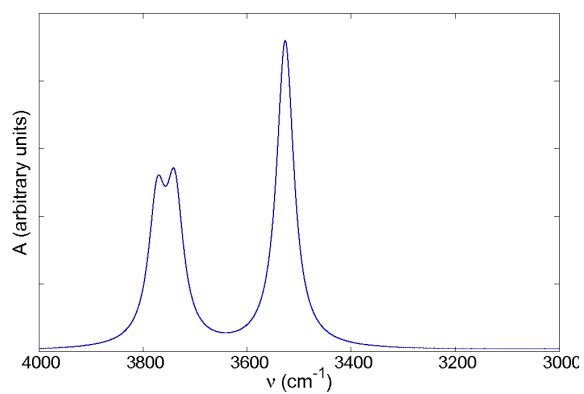

**Figure S16.** IR of the fully hydroxylated 111 crystalline model from Figure S9.

## References

1. X. Rozanska, F. Delbecq and P. Sautet, *Phys. Chem. Chem. Phys.*, 2010, **12**, 14930-14940.
